# Supplementary material
Source: publisher figshare collection journal article supplement (https://tandf.figshare.com/articles/dataset/_/6633005)
Supplement: Supplementary file 2 [file 2]

## Supplementary Information

### An artificial inoculation protocol for *Uromycladium acaciae*, cause of a serious disease of *Acacia mearnsii* in southern Africa

Stuart Fraser, Alistair R McTaggart, Julian Moreno Chan, Thobile Nxumalo, Louise S Shuey, Michael J Wingfield and Jolanda Roux

*Southern Forests* 2019, 81(1): 85–90.

<https://doi.org/10.2989/20702620.2018.1468985>

**Table S1:** Rust severity scoring system used for *Uromycladium acaciae* on *Acacia mearnsii* in field trials (J Moreno Chan, ICFR, unpublished data)

| Score | Rust severity    | Percentage of the branch covered with telia |
|-------|------------------|---------------------------------------------|
| 0     | Rust not present | No rust                                     |
| 1     | Low              | 1%–25%                                      |
| 2     | Moderate         | 26%–50%                                     |
| 3     | Severe           | 51%–75%                                     |
| 4     | Very severe      | >75%                                        |
