# Supplementary material
Source: publisher figshare collection journal article supplement (https://tandf.figshare.com/articles/dataset/_/6633005)
Supplement: Supplementary file 3 [file 2]

Archive with 2 entries (2 files):
- tsfs_a_1468985_sm2917.pdf
- tsfs_a_1468985_sm1910.pdf
